# Supplementary material for: EI24 Inhibits Cell Proliferation and Drug Resistance of Esophageal Squamous Cell Carcinoma
Source: PubMed Central journal article supplement (PMC7471874; doi:10.3389/fonc.2020.01570), 2020-08-21
Supplement: Data_Sheet_3.pdf [file Data_Sheet_3.pdf]

**Table S1.** Potential pathways involved in the upstream regulatory networks and downstream functions in which DEGs between EC109/EI24-OE and EC109/EI24-NC cells participate (top five).

| <b>Regulators</b>                              | <b>Target Molecules in Dataset</b>                                                                                                | <b>Diseases<br/>&amp;<br/>Functions</b>   | <b>Consistency Score</b> |
|------------------------------------------------|-----------------------------------------------------------------------------------------------------------------------------------|-------------------------------------------|--------------------------|
| IL1A<br>(interleukin 1 alpha)                  | APP, CCL20, CCL5, CD40,<br>CXCL2, CXCL3, CXCL8, ICAM1,<br>ITGAV, ITGB1, PLAU, PTGS2,<br>S100A8, S100A9, SAA1,<br>SERPINE1, WNT5A. | Migration of phagocytes                   | 3.881                    |
| COL18A1<br>(collagen type XVIII alpha 1 chain) | EDN1, EFNA1, EGFR, F2RL1, F3,<br>FN1, HIF1A, ITGAV, MCL1,<br>PLAU, PTGS2, SERPINE1, STAT1,<br>THBS1, VEGFA.                       | Cell proliferation of<br>tumor cell lines | 3.873                    |
| hydrogen peroxide                              | APP, CXCL3, CXCL8, EDN1,<br>EGFR, F2RL1, FN1, HMGB1,<br>ICAM1, ITGA2, LCN2, MDK,<br>PTGS2, SERPINE1, VEGFA.                       | Chemotaxis                                | 3.873                    |
| hydrogen peroxide                              | APP, CXCL3, CXCL8, EDN1,<br>EGFR, F2RL1, FN1, HMGB1,<br>ICAM1, ITGA2, LCN2, MDK,<br>PTGS2, SERPINE1, VEGFA.                       | Homing of cells                           | 3.873                    |
| AGT<br>(angiotensinogen)                       | CCL5, CTSS, CXCL2, CXCL3,<br>CXCL8, FN1, HIF1A, ICAM1,<br>IL6ST, ITGAV, ITGB1, PLAU,<br>PTGS2, RHOA, SERPINE1,<br>VEGFA.          | Migration of phagocytes                   | 3.75                     |

**Table S2.** Potential pathways involved in the upstream regulatory networks and downstream functions in which DEGs between TE-1/EI24-KO and TE-1/EI24-NC cells participate (top five).

| <b>Regulators</b>  | <b>Target Molecules in Dataset</b>                                                 | <b>Diseases<br/>&amp;<br/>Functions</b> | <b>Consistency Score</b> |
|--------------------|------------------------------------------------------------------------------------|-----------------------------------------|--------------------------|
| CDH1, LEP, RARB    | BMP7, INS, NR3C1, SPP1, SREBF1, TGFB1, VEGFA                                       | Glomerulosclerosis                      | 2.268                    |
| NDP                | BDNF, CNTF, FGF2, LIF                                                              | Growth of lesion                        | 2                        |
| APEX1, NPM1, SAFB  | B2M, CSF1, CXCL2, FTH1, HEXA, HLA-C, IGF1, IL10, IL6ST, PSMB9, TP53, VEGFA         | Systemic autoimmune syndrome            | 0.866                    |
| CDH1, WISP2        | BIRC5, CD44, CTNNB1, EGFR, ERBB3, HIF1A, IFITM1, LAMB3, SERPINE1, SOX9, VEGFA, VIM | Renal Cancer and Tumors                 | 0.866                    |
| GNA12, miR-199a-3p | BRAF, CD44, EGFR, EZR, ITGA6, MET, PSMB5, VEGFA                                    | Progression of tumor                    | 0.707                    |

Abbreviation: cadherin 1 (CDH1), leptin (LEP), retinoic acid receptor beta (RARB), norrin cystine knot growth factor NDP (NDP), apurinic/aprimidinic endodeoxyribonuclease 1 (APEX1), nucleophosmin 1 (NPM1), scaffold attachment factor B (SAFB), WNT1 inducible signaling pathway protein 2 (WISP2), G protein subunit alpha 12 (GNA12), microRNA-199a-3p (miR-199a-3p).
